# Supplementary material for: Reducing the Oxidation Level of Dextran Aldehyde in a Chitosan/Dextran-Based Surgical Hydrogel Increases Biocompatibility and Decreases Antimicrobial Efficacy
Source: PubMed Central journal article supplement (PMC4490524; doi:10.3390/ijms160613798), 2015-06-16
Supplement: ijms-16-13798-s001.pdf [file ijms-16-13798-s001.pdf]

## Supplementary Information

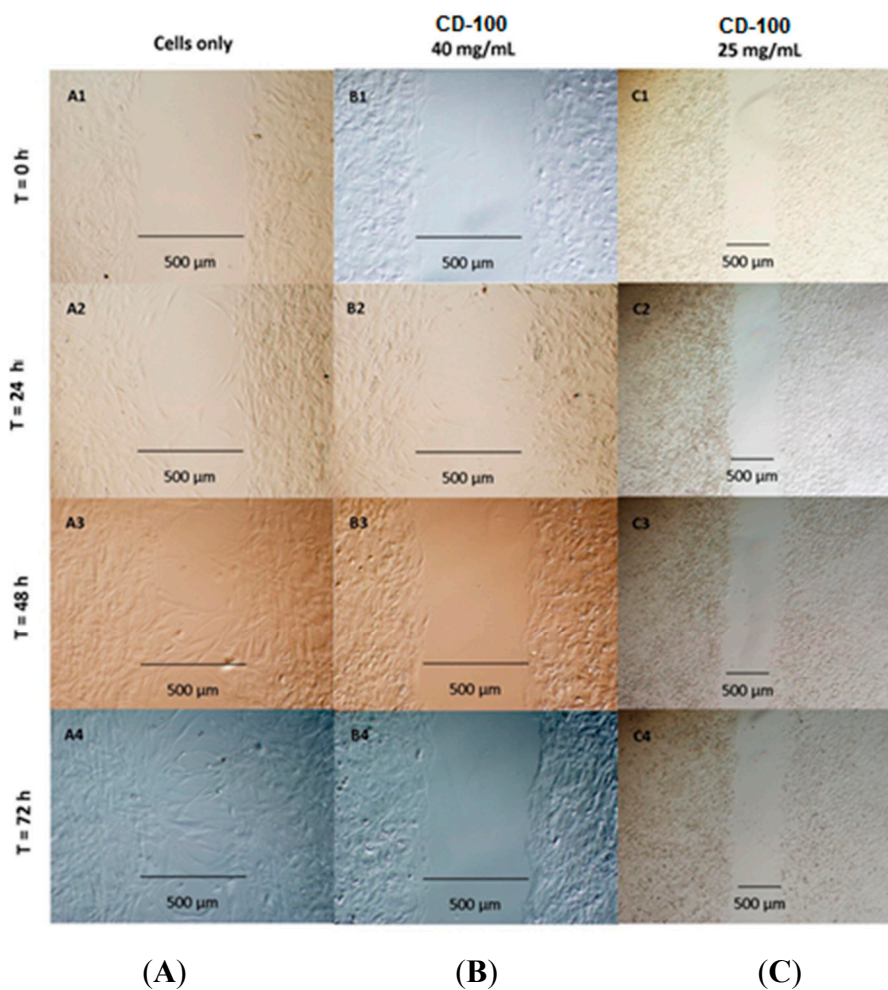

**Figure S1.** Migration of dermal fibroblast cells only (A); fibroblast cells co-incubated with (B)  $40 \text{ mg}\cdot\text{mL}^{-1}$  and (C)  $25 \text{ mg}\cdot\text{mL}^{-1}$  of CD-100 using an IBIDI cell culture insert system. Images were captured at time 0, 24, 48, and 72 h incubation time using an Olympus IX70 microscope.

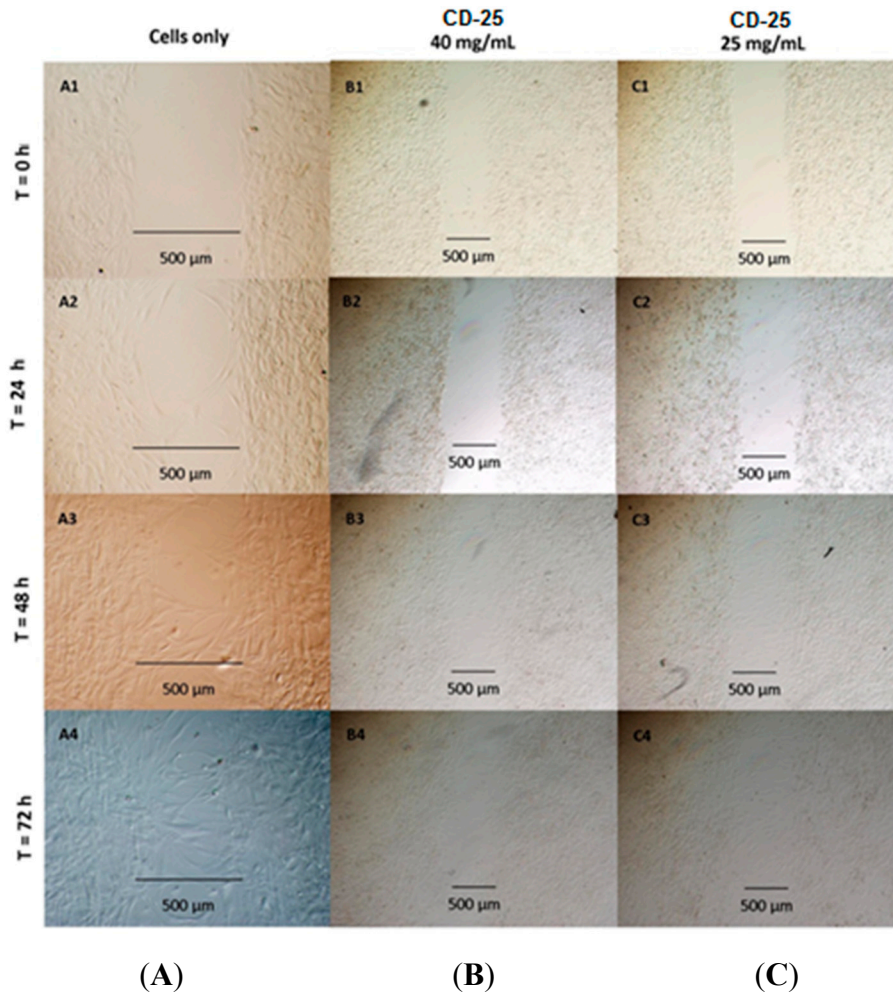

**Figure S2.** Migration of dermal fibroblast cells only (A); fibroblast cells co-incubated with (B)  $40 \text{ mg} \cdot \text{mL}^{-1}$  and (C)  $25 \text{ mg} \cdot \text{mL}^{-1}$  of CD-25 using an IBIDI cell culture insert system. Images were captured at time 0, 24, 48, and 72 h incubation time using an Olympus IX70 microscope.
